# Supplementary material for: Uncoupling associations of risk alleles with endophenotypes and phenotypes: insights from the ApoB locus and heart‐related traits
Source: PubMed Central journal article supplement (PMC5242299; doi:10.1111/acel.12526), 2016-09-28
Supplement: ACEL-16-61-s001.pdf [file ACEL-16-61-s001.pdf]

**Figure S1. Linkage disequilibrium (LD) patterns.**

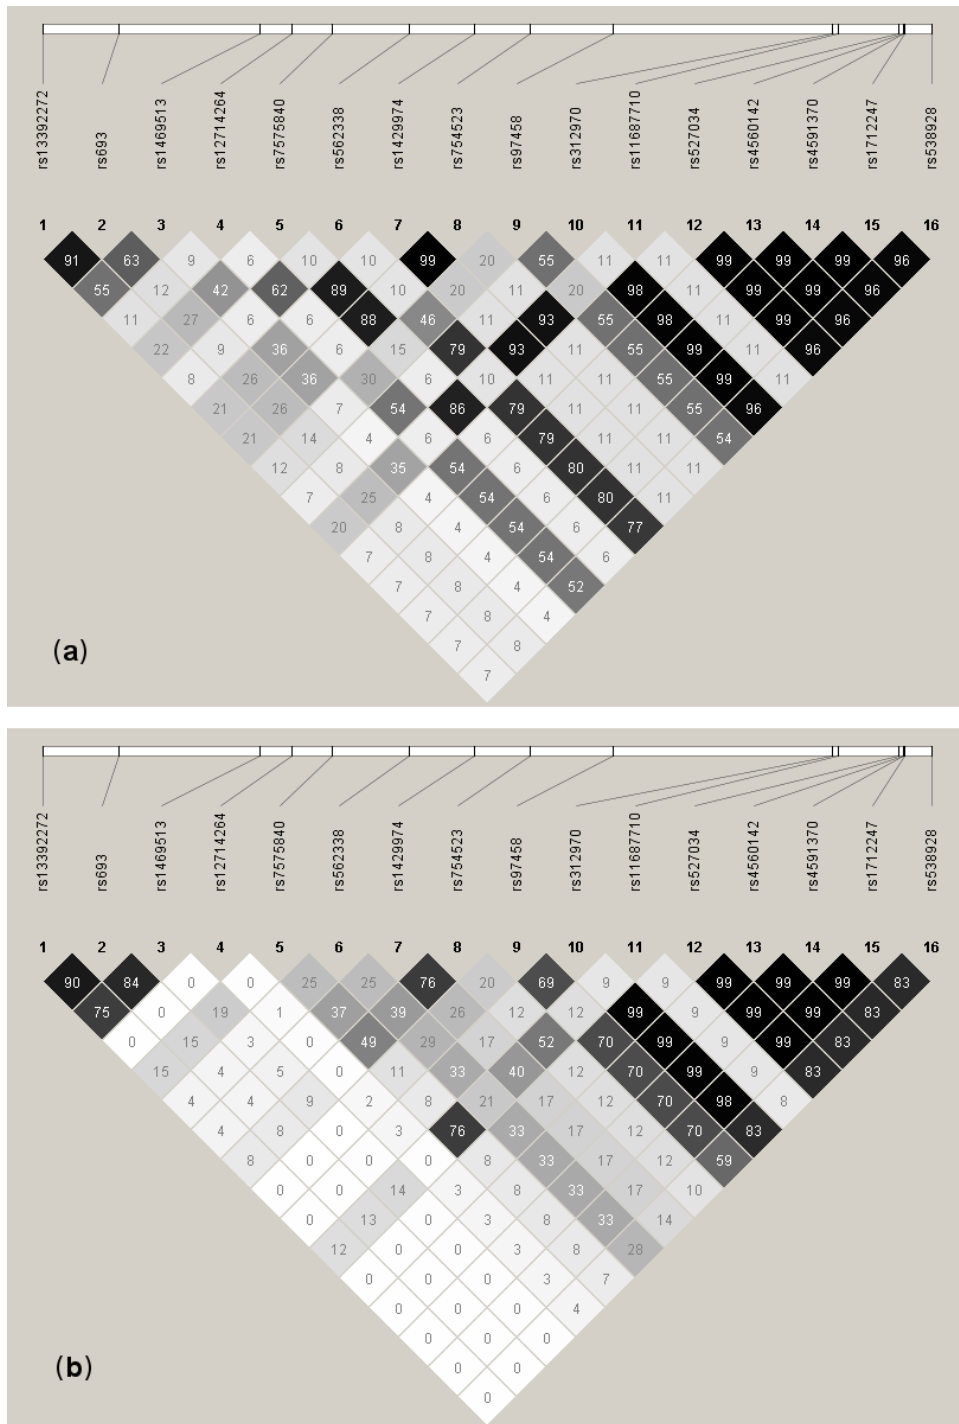

The LD patterns are for selected SNPs in the *ApoB* locus for (a) whites and (b) blacks in the ARIC study.

These LD patterns are representative of those for whites and blacks observed in the other studies.
