# Supplementary material for: Uncoupling associations of risk alleles with endophenotypes and phenotypes: insights from the ApoB locus and heart‐related traits
Source: PubMed Central journal article supplement (PMC5242299; doi:10.1111/acel.12526), 2016-09-28
Supplement: ACEL-16-61-s002.pdf [file ACEL-16-61-s002.pdf]

**Table S1. Basic characteristics of the genotyped participants of each Framingham cohort.**

| Factor                                              | rs693        |              |              | rs562338     |              |              |
|-----------------------------------------------------|--------------|--------------|--------------|--------------|--------------|--------------|
|                                                     | GG           | GA           | AA           | GG           | GA           | AA           |
| <b>Framingham Heart Study (FHS) original cohort</b> |              |              |              |              |              |              |
| N (% <sup>*</sup> )                                 | 270 (24.4)   | 570 (51.6)   | 265 (24)     | 699 (64.4)   | 341 (31.4)   | 45 (4.1)     |
| Age, mean (SD), years                               | 37.2 (5.8)   | 37.8 (6.1)   | 38.2 (5.9)   | 37.5 (5.8)   | 37.8 (6.2)   | 38 (5.5)     |
| LS, mean (SD), years                                | 88.1 (6.9)   | 88.4 (7)     | 88.1 (7.1)   | 88.3 (7)     | 88.4 (6.7)   | 87.8 (7.4)   |
| TC, mean (SD), mg/dl <sup>***</sup>                 | 233.7 (40.5) | 238 (40.5)   | 244.8 (52.9) | 240.6 (45.3) | 236.2 (40.8) | 221.7 (36.3) |
| HDL-C, mean (SD), mg/dl <sup>***</sup>              | 49 (12.8)    | 49.9 (14.7)  | 49.8 (15.3)  | 49.9 (14.5)  | 49.7 (14.8)  | 47.8 (11.1)  |
| MI, yes (% <sup>**</sup> )                          | 79 (29.3)    | 148 (26)     | 56 (21.1)    | 174 (24.9)   | 88 (25.8)    | 11 (24.4)    |
| Death, yes (% <sup>**</sup> )                       | 240 (88.9)   | 508 (89.1)   | 247 (93.2)   | 622 (89)     | 310 (90.9)   | 43 (95.6)    |
| <b>FHS Offspring cohort</b>                         |              |              |              |              |              |              |
| N (% <sup>*</sup> )                                 | 953 (26.5)   | 1686 (46.9)  | 955 (26.6)   | 2320 (64.6)  | 1109 (30.9)  | 162 (4.5)    |
| Age, mean (SD), years                               | 35.1 (9.9)   | 35.3 (10)    | 35.6 (10.1)  | 35.4 (10.1)  | 35.2 (9.7)   | 35.1 (9.7)   |
| LS, mean (SD), years                                | 71.9 (9.4)   | 71.9 (9.1)   | 72.2 (9.3)   | 72 (9.3)     | 72 (9.1)     | 72.1 (9)     |
| TC, mean (SD), mg/dl                                | 189.7 (37.1) | 193.6 (37.4) | 198.8 (39.7) | 196 (38.1)   | 190.4 (38)   | 187.8 (36.2) |
| HDL-C, mean (SD), mg/dl                             | 52.3 (15.2)  | 50.9 (14.4)  | 50 (14.4)    | 50.7 (14.6)  | 51.6 (14.5)  | 51.5 (15.7)  |
| MI, yes (% <sup>**</sup> )                          | 104 (10.9)   | 173 (10.3)   | 90 (9.4)     | 240 (10.3)   | 103 (9.3)    | 24 (14.8)    |
| Death, yes (% <sup>**</sup> )                       | 182 (19.1)   | 363 (21.5)   | 202 (21.2)   | 502 (21.6)   | 217 (19.6)   | 26 (16)      |
| <b>FHS 3<sup>rd</sup> Generation cohort</b>         |              |              |              |              |              |              |
| N (% <sup>*</sup> )                                 | 1009 (26.7)  | 1789 (47.4)  | 978 (25.9)   | 2384 (63.2)  | 1195 (31.7)  | 194 (5.1)    |
| Age, mean (SD), years                               | 40.4 (8.8)   | 40.1 (8.9)   | 39.7 (8.9)   | 40 (9.1)     | 40.2 (8.5)   | 40.2 (8.8)   |
| LS, mean (SD), years                                | 48 (9)       | 47.8 (9.1)   | 47.4 (9.1)   | 47.6 (9.2)   | 47.9 (8.6)   | 47.6 (9.2)   |
| TC, mean (SD), mg/dl                                | 185.9 (38.3) | 189.3 (34.4) | 191.4 (34.5) | 190.5 (35.8) | 186.7 (35.2) | 184.1 (33.4) |
| HDL-C, mean (SD), mg/dl                             | 54.2 (15.6)  | 55 (16)      | 53.6 (16.7)  | 54.4 (16.1)  | 54.7 (16.2)  | 52.7 (14.9)  |
| MI, yes (% <sup>**</sup> )                          | 7 (0.7)      | 16 (0.9)     | 16 (1.6)     | 22 (0.9)     | 15 (1.3)     | 2 (1)        |
| Death, yes (% <sup>**</sup> )                       | 11 (1.1)     | 14 (0.8)     | 11 (1.1)     | 25 (1)       | 9 (0.8)      | 2 (1)        |

\* Percentage is within the genotyped sample; \*\* percentage is within each genotype.

N denotes sample size.

Mean age is given at baselines.

LS denotes lifespan, i.e., age at death or the end of follow-up.

TC denotes total cholesterol; HDL-C denotes high-density lipoprotein cholesterol; MI denotes myocardial infarction.

\*\*\* Mean TC and HDL-C were measured at examination 9 for FHS original cohort because this examination included the largest sample size with non-missing information on these lipids. For the other FHS cohorts mean TC and HDL-C were representatively given at baselines.
