# Supplementary material for: Uncoupling associations of risk alleles with endophenotypes and phenotypes: insights from the ApoB locus and heart‐related traits
Source: PubMed Central journal article supplement (PMC5242299; doi:10.1111/acel.12526), 2016-09-28
Supplement: ACEL-16-61-s003.pdf [file ACEL-16-61-s003.pdf]

**Table S2. The associations of genetic variants with lipids in each Framingham cohort.**

| Genetic factor,<br>model                                   | FHS Original Cohort, N=1,077 |      |         | FHS Offspring, N=3,589 |      |         | FHS 3 <sup>rd</sup> Generation, N=3,770 |      |         |
|------------------------------------------------------------|------------------------------|------|---------|------------------------|------|---------|-----------------------------------------|------|---------|
|                                                            | Beta                         | SE   | p-value | Beta                   | SE   | p-value | Beta                                    | SE   | p-value |
| <b><i>Total cholesterol (TC)</i></b>                       |                              |      |         |                        |      |         |                                         |      |         |
| rs693, M1                                                  | 0.23                         | 0.28 | 4.1E-01 | 0.88                   | 0.14 | 6.9E-10 | 0.82                                    | 0.18 | 3.5E-06 |
| rs562338, M1                                               | -0.66                        | 0.34 | 5.4E-02 | -1.12                  | 0.18 | 5.7E-10 | -0.93                                   | 0.22 | 1.9E-05 |
| rs693, M2                                                  | 0.05                         | 0.30 | 8.5E-01 | 0.64                   | 0.15 | 3.0E-05 | 0.62                                    | 0.19 | 1.3E-03 |
| rs562338, M2                                               | -0.63                        | 0.36 | 8.1E-02 | -0.82                  | 0.20 | 2.5E-05 | -0.63                                   | 0.24 | 7.7E-03 |
| PS-AA                                                      | -0.18                        | 0.27 | 4.9E-01 | 0.18                   | 0.14 | 2.1E-01 | 0.19                                    | 0.18 | 2.8E-01 |
| PS-GA                                                      | -0.31                        | 0.20 | 1.2E-01 | -0.78                  | 0.10 | 3.4E-14 | -0.68                                   | 0.13 | 5.7E-08 |
| <b><i>High-density lipoprotein cholesterol (HDL-C)</i></b> |                              |      |         |                        |      |         |                                         |      |         |
| rs693, M1                                                  | -0.59                        | 0.44 | 1.8E-01 | -0.54                  | 0.24 | 2.3E-02 | -0.24                                   | 0.26 | 2.1E-01 |
| rs562338, M1                                               | -0.31                        | 0.55 | 5.7E-01 | 0.08                   | 0.30 | 7.9E-01 | -0.18                                   | 0.32 | 3.1E-01 |
| rs693, M2                                                  | -0.77                        | 0.47 | 1.0E-01 | -0.60                  | 0.26 | 1.9E-02 | -0.35                                   | 0.28 | 2.1E-01 |
| rs562338, M2                                               | -0.63                        | 0.58 | 2.7E-01 | -0.20                  | 0.33 | 5.4E-01 | -0.35                                   | 0.34 | 3.1E-01 |
| PS-AA                                                      | -0.73                        | 0.42 | 8.5E-02 | -0.48                  | 0.24 | 4.0E-02 | -0.35                                   | 0.26 | 1.7E-01 |
| PS-GA                                                      | 0.29                         | 0.32 | 3.5E-01 | 0.31                   | 0.17 | 6.8E-02 | 0.12                                    | 0.18 | 5.2E-01 |

N denotes maximal number of individuals in the analyses with missing information on rs693, rs562338, total cholesterol, and high-density lipoprotein cholesterol excluded.

M1 denotes model 1 with one reference SNP included.

M2 denotes model 2 with both reference SNPs included.

PS-AA and PS-GA denote polygenic scores constructed as counts of the rs693\_A or rs562338\_A and rs693\_G or rs562338\_A alleles, respectively.

The effect size beta evaluated for  $100 \times \log_{10}(TC)$  and  $100 \times \log_{10}(HDL-C)$  is the estimate of cumulative genetic effects over multiple examinations using mixed effects regression model. Sign of beta indicates direction of the effect in additive genetic models. The effect alleles were: (i) allele(s) A in each SNP and in polygenic score PS-AA and (ii) alleles G and A in polygenic score PS-GA.

SE denotes standard error.
