# Supplementary material for: Uncoupling associations of risk alleles with endophenotypes and phenotypes: insights from the ApoB locus and heart‐related traits
Source: PubMed Central journal article supplement (PMC5242299; doi:10.1111/acel.12526), 2016-09-28
Supplement: ACEL-16-61-s004.pdf [file ACEL-16-61-s004.pdf]

**Table S3. The effect of lipid lowering treatment on the associations of genetic variants with total cholesterol.**

| Genetic factor,<br>model                          | ARIC, N=9,501 |      |         | FHS, N=7,357 |      |         | MESA, N=2,522 |      |         | CHS, N=4,208 |      |         |
|---------------------------------------------------|---------------|------|---------|--------------|------|---------|---------------|------|---------|--------------|------|---------|
|                                                   | Beta          | SE   | p-value | Beta         | SE   | p-value | Beta          | SE   | p-value | Beta         | SE   | p-value |
| <i>No adjustment for lipid lowering treatment</i> |               |      |         |              |      |         |               |      |         |              |      |         |
| rs693, M1                                         | 0.79          | 0.10 | 4.6E-15 | 0.88         | 0.12 | 2.9E-14 | 0.42          | 0.19 | 2.6E-02 | 0.61         | 0.16 | 1.0E-04 |
| rs562338, M1                                      | -1.14         | 0.13 | 9.4E-18 | -1.07        | 0.15 | 1.4E-13 | -0.76         | 0.23 | 1.0E-03 | -1.18        | 0.20 | 3.3E-09 |
| rs693, M2                                         | 0.58          | 0.11 | 3.6E-08 | 0.65         | 0.13 | 1.9E-07 | 0.25          | 0.20 | 2.1E-01 | 0.34         | 0.17 | 4.2E-02 |
| rs562338, M2                                      | -0.91         | 0.14 | 6.9E-11 | -0.77        | 0.16 | 9.3E-07 | -0.66         | 0.24 | 6.4E-03 | -1.04        | 0.21 | 9.8E-07 |
| PS-GA                                             | -0.74         | 0.07 | 9.6E-24 | -0.77        | 0.08 | 2.8E-20 | -0.42         | 0.13 | 1.6E-03 | -0.68        | 0.11 | 2.1E-09 |
| <i>Adjusted for lipid lowering treatment</i>      |               |      |         |              |      |         |               |      |         |              |      |         |
| rs693, M1                                         | 0.83          | 0.10 | 1.8E-15 | 0.94         | 0.12 | 1.0E-14 | 0.55          | 0.19 | 2.8E-03 | 0.61         | 0.16 | 1.1E-04 |
| rs562338, M1                                      | -1.19         | 0.13 | 2.9E-18 | -1.15        | 0.15 | 3.8E-14 | -1.01         | 0.23 | 9.3E-06 | -1.18        | 0.20 | 4.8E-09 |
| rs693, M2                                         | 0.61          | 0.11 | 2.3E-08 | 0.69         | 0.13 | 1.3E-07 | 0.33          | 0.20 | 9.6E-02 | 0.34         | 0.17 | 4.2E-02 |
| rs562338, M2                                      | -0.95         | 0.14 | 3.4E-11 | -0.82        | 0.13 | 4.8E-07 | -0.88         | 0.24 | 2.4E-04 | -1.03        | 0.21 | 1.3E-06 |
| PS-GA                                             | -0.78         | 0.08 | 1.4E-24 | -0.82        | 0.09 | 5.1E-21 | -0.56         | 0.13 | 2.3E-05 | -0.68        | 0.11 | 2.6E-09 |

N denotes maximal number of individuals in the analyses with missing information on rs693, rs562338, total cholesterol, high-density lipoprotein cholesterol, and lipid lowering treatment excluded.

M1 denotes model 1 with one reference SNP included.

M2 denotes model 2 with both reference SNPs included.

PS-GA denotes polygenic scores constructed as counts of rs693\_G or rs562338\_A alleles.

The effect size beta evaluated for  $100 \times \log_{10}(TC)$  is the estimate of cumulative genetic effects over multiple examinations using mixed effects regression model. Sign of beta indicates direction of the effect in additive genetic models. The effect alleles were: (i) allele(s) A in each SNP and (ii) alleles G and A in polygenic score PS-GA.

SE denotes standard error.
