# Supplementary material for: Uncoupling associations of risk alleles with endophenotypes and phenotypes: insights from the ApoB locus and heart‐related traits
Source: PubMed Central journal article supplement (PMC5242299; doi:10.1111/acel.12526), 2016-09-28
Supplement: ACEL-16-61-s005.pdf [file ACEL-16-61-s005.pdf]

**Table S4. The effect of lipid lowering treatment on the associations of genetic variants with high-density lipoprotein cholesterol.**

| Genetic factor,<br>model                          | ARIC, N=9,501 |      |         | FHS, N=7,357 |      |         | MESA, N=2,522 |      |         | CHS, N=4,208 |      |         |
|---------------------------------------------------|---------------|------|---------|--------------|------|---------|---------------|------|---------|--------------|------|---------|
|                                                   | Beta          | SE   | p-value | Beta         | SE   | p-value | Beta          | SE   | p-value | Beta         | SE   | p-value |
| <i>No adjustment for lipid lowering treatment</i> |               |      |         |              |      |         |               |      |         |              |      |         |
| rs693, M1                                         | -0.31         | 0.17 | 6.6E-02 | -0.36        | 0.18 | 4.1E-02 | -0.13         | 0.30 | 6.7E-01 | 0.16         | 0.23 | 5.0E-01 |
| rs562338, M1                                      | 0.02          | 0.22 | 9.4E-01 | -0.12        | 0.22 | 6.0E-01 | -0.19         | 0.37 | 6.1E-01 | 0.10         | 0.29 | 7.5E-01 |
| rs693, M2                                         | -0.34         | 0.18 | 5.7E-02 | -0.46        | 0.19 | 1.6E-02 | -0.20         | 0.32 | 5.4E-01 | 0.20         | 0.21 | 3.2E-01 |
| rs562338, M2                                      | -0.12         | 0.23 | 6.1E-01 | -0.32        | 0.24 | 1.6E-01 | -0.26         | 0.39 | 5.0E-01 | 0.18         | 0.31 | 5.6E-01 |
| PS-AA                                             | -0.28         | 0.16 | 8.8E-02 | -0.43        | 0.18 | 1.5E-02 | -0.22         | 0.28 | 4.5E-01 | 0.18         | 0.22 | 4.1E-01 |
| <i>Adjusted for lipid lowering treatment</i>      |               |      |         |              |      |         |               |      |         |              |      |         |
| rs693, M1                                         | -0.31         | 0.17 | 5.9E-02 | -0.36        | 0.18 | 4.1E-02 | -0.14         | 0.30 | 6.5E-01 | 0.16         | 0.23 | 5.0E-01 |
| rs562338, M1                                      | 0.03          | 0.22 | 8.9E-01 | -0.12        | 0.22 | 6.0E-01 | -0.17         | 0.37 | 6.5E-01 | 0.09         | 0.29 | 7.5E-01 |
| rs693, M2                                         | -0.34         | 0.18 | 5.3E-02 | -0.46        | 0.19 | 1.6E-02 | -0.20         | 0.32 | 5.3E-01 | 0.20         | 0.24 | 4.0E-01 |
| rs562338, M2                                      | -0.11         | 0.23 | 6.5E-01 | -0.33        | 0.24 | 1.6E-01 | -0.25         | 0.39 | 5.3E-01 | 0.18         | 0.31 | 5.6E-01 |
| PS-AA                                             | -0.27         | 0.16 | 8.8E-02 | -0.43        | 0.18 | 1.5E-02 | -0.21         | 0.28 | 4.5E-01 | 0.18         | 0.22 | 4.0E-01 |

N denotes maximal number of individuals in the analyses with missing information on rs693, rs562338, total cholesterol, high-density lipoprotein cholesterol, and lipid lowering treatment excluded.

M1 denotes model 1 with one reference SNP included.

M2 denotes model 2 with both reference SNPs included.

PS-AA denotes polygenic scores constructed as counts of rs693\_A or rs562338\_A alleles.

The effect size beta evaluated for  $100 \times \log_{10}(\text{HDL-C})$  is the estimate of cumulative genetic effects over multiple examinations using mixed effects regression model. Sign of beta indicates direction of the effect in additive genetic models. The effect alleles were allele(s) A in each SNP and polygenic score PS-AA.

SE denotes standard error.
