# Supplementary material for: Uncoupling associations of risk alleles with endophenotypes and phenotypes: insights from the ApoB locus and heart‐related traits
Source: PubMed Central journal article supplement (PMC5242299; doi:10.1111/acel.12526), 2016-09-28
Supplement: ACEL-16-61-s006.pdf [file ACEL-16-61-s006.pdf]

**Table S5. The effect of total cholesterol on the associations of rs693 and rs562338 with high-density lipoprotein cholesterol.**

| Genetic factor,<br>model                   | ARIC, N=9,585 |      |         | FHS, N=8,436 |      |         | MESA, N=2,680 |      |         | CHS, N=4,208 |      |         |
|--------------------------------------------|---------------|------|---------|--------------|------|---------|---------------|------|---------|--------------|------|---------|
|                                            | Beta          | SE   | p-value | Beta         | SE   | p-value | Beta          | SE   | p-value | Beta         | SE   | p-value |
| <i>No adjustment for total cholesterol</i> |               |      |         |              |      |         |               |      |         |              |      |         |
| rs693, M1                                  | -0.32         | 0.17 | 5.6E-2  | -0.41        | 0.17 | 1.5E-2  | -0.04         | 0.29 | 8.9E-1  | 0.16         | 0.23 | 5.0E-1  |
| rs562338, M1                               | 0.04          | 0.22 | 8.4E-1  | -0.16        | 0.21 | 4.5E-1  | -0.19         | 0.36 | 5.9E-1  | 0.10         | 0.29 | 7.5E-1  |
| rs693, M2                                  | -0.34         | 0.18 | 5.3E-2  | -0.52        | 0.18 | 3.5E-3  | -0.10         | 0.31 | 7.4E-1  | 0.20         | 0.21 | 3.2E-1  |
| rs562338, M2                               | -0.09         | 0.23 | 7.0E-1  | -0.39        | 0.22 | 7.6E-2  | -0.23         | 0.38 | 5.4E-1  | 0.18         | 0.31 | 5.6E-1  |
| <i>Adjusted for total cholesterol</i>      |               |      |         |              |      |         |               |      |         |              |      |         |
| rs693, M1                                  | -0.39         | 0.17 | 2.1E-02 | -0.50        | 0.17 | 2.8E-03 | -0.09         | 0.29 | 7.5E-01 | 0.04         | 0.23 | 8.6E-01 |
| rs562338, M1                               | 0.14          | 0.22 | 5.2E-01 | -0.04        | 0.21 | 8.6E-01 | -0.08         | 0.36 | 8.2E-01 | 0.31         | 0.29 | 2.7E-01 |
| rs693, M2                                  | -0.39         | 0.18 | 2.7E-02 | -0.59        | 0.18 | 1.0E-03 | -0.13         | 0.31 | 6.7E-01 | 0.14         | 0.24 | 5.7E-01 |
| rs562338, M2                               | -0.01         | 0.23 | 9.5E-01 | -0.30        | 0.22 | 1.7E-01 | -0.13         | 0.38 | 7.2E-01 | 0.38         | 0.31 | 2.2E-01 |

N denotes maximal number of individuals in the analyses with missing information on rs693, rs562338, total cholesterol, and high-density lipoprotein cholesterol excluded.

M1 denotes model 1 with one reference SNP included.

M2 denotes model 2 with both reference SNPs included.

The effect size beta evaluated for  $100 \times \log_{10}(\text{HDL-C})$  is the estimate of cumulative genetic effects over multiple examinations using mixed effects regression model. Sign of beta indicates direction of the effect in additive genetic models with allele A considered as an effect allele in each SNP.

SE denotes standard error.
