# Supplementary material for: Uncoupling associations of risk alleles with endophenotypes and phenotypes: insights from the ApoB locus and heart‐related traits
Source: PubMed Central journal article supplement (PMC5242299; doi:10.1111/acel.12526), 2016-09-28
Supplement: ACEL-16-61-s009.pdf [file ACEL-16-61-s009.pdf]

**Table S8. The effect of lipids on the pooled associations of rs693 and rs562338 with risks of myocardial infarction.**

| Genetic factor, model | Lipid adjustment | All<br>N <sub>T/C</sub> =20,748/2,357 |      |         | ARIC + FHS*<br>N <sub>T/C</sub> =14,047/1,351 |      |         | MESA + CHS<br>N <sub>T/C</sub> =6,701/1,006 |      |         | Absolute<br>N <sub>T/C</sub> =20,748/2,357 |      |         |
|-----------------------|------------------|---------------------------------------|------|---------|-----------------------------------------------|------|---------|---------------------------------------------|------|---------|--------------------------------------------|------|---------|
|                       |                  | Beta                                  | SE   | p-value | Beta                                          | SE   | p-value | Beta                                        | SE   | p-value | Beta                                       | SE   | p-value |
| rs693, M1             | No               | -0.01                                 | 0.03 | 6.7E-1  | -0.12                                         | 0.04 | 2.0E-3  | 0.13                                        | 0.05 | 3.7E-3  | 0.13                                       | 0.03 | 1.5E-5  |
| rs562338, M1          | No               | -0.02                                 | 0.04 | 6.2E-1  | -0.02                                         | 0.05 | 6.4E-1  | -0.01                                       | 0.06 | 8.1E-1  | 0.04                                       | 0.04 | 2.5E-1  |
| rs693, M2             | No               | -0.02                                 | 0.03 | 5.3E-1  | -0.14                                         | 0.04 | 5.9E-4  | 0.15                                        | 0.05 | 2.8E-3  | 0.15                                       | 0.03 | 3.3E-6  |
| rs562338, M2          | No               | -0.03                                 | 0.04 | 5.0E-1  | -0.08                                         | 0.05 | 1.2E-1  | 0.05                                        | 0.06 | 4.4E-1  | 0.07                                       | 0.04 | 7.9E-2  |
| rs693, M1             | TC               | -0.03                                 | 0.03 | 2.8E-1  | -0.16                                         | 0.04 | 7.2E-5  | 0.13                                        | 0.05 | 4.2E-3  | 0.15                                       | 0.03 | 5.5E-7  |
| rs562338, M1          | TC               | 0.006                                 | 0.04 | 8.8E-1  | 0.02                                          | 0.05 | 6.7E-1  | -0.01                                       | 0.06 | 8.5E-1  | 0.05                                       | 0.04 | 2.2E-1  |
| rs693, M2             | TC               | -0.03                                 | 0.03 | 2.7E-1  | -0.17                                         | 0.04 | 5.0E-5  | 0.14                                        | 0.05 | 3.1E-3  | 0.16                                       | 0.03 | 2.9E-7  |
| rs562338, M2          | TC               | -0.01                                 | 0.04 | 8.3E-1  | -0.05                                         | 0.05 | 3.7E-1  | 0.05                                        | 0.06 | 4.3E-1  | 0.05                                       | 0.04 | 2.0E-1  |
| rs693, M1             | TC+HDL-C         | -0.04                                 | 0.03 | 1.6E-1  | -0.17                                         | 0.04 | 2.0E-5  | 0.13                                        | 0.05 | 4.9E-3  | 0.16                                       | 0.03 | 1.8E-7  |
| rs562338, M1          | TC+HDL-C         | 0.01                                  | 0.04 | 8.0E-1  | 0.02                                          | 0.05 | 7.4E-1  | 0.004                                       | 0.06 | 9.5E-1  | 0.04                                       | 0.04 | 2.5E-1  |
| rs693, M2             | TC+HDL-C         | -0.04                                 | 0.03 | 1.6E-1  | -0.18                                         | 0.04 | 1.1E-5  | 0.15                                        | 0.05 | 2.6E-3  | 0.17                                       | 0.03 | 5.5E-8  |
| rs562338, M2          | TC+HDL-C         | -0.01                                 | 0.04 | 8.3E-1  | -0.06                                         | 0.05 | 2.8E-1  | 0.07                                        | 0.06 | 2.8E-1  | 0.06                                       | 0.04 | 1.2E-1  |

N<sub>T/C</sub> denotes total number (T) of individuals in the analyses and the number of cases (C) among them.

M1 denotes model 1 with one reference SNP included.

M2 denotes model 2 with both reference SNPs included.

“No” denotes no adjustment for lipids (total cholesterol [TC] and high-density lipoprotein cholesterol [HDL-C]); “TC” denotes adjustment for TC, and “TC+HDL-C” denotes adjustment for TC and HDL-C.

The effect beta was evaluated in the Cox proportional hazard regression model. Sign of beta indicates direction of the effect in additive genetic models with alleles A considered as effect alleles for each SNP.

SE denotes standard error.

Columns “All” show the results of mega-analysis of all studies, which resembled conventional strategy of meta-analyses in GWAS pooling the estimated effects from each study.

Columns “ARIC + FHS\*” and “MESA + CHS” show the results of mega-analyses of more homogeneous samples.

Columns “Absolute” show the results of the meta-analysis pooling the associations from all studies regardless of the effect directions, i.e., for absolute values of the effects. Meta-analysis was conducted because the proportionality assumption in the Cox proportional hazard model was violated in this case.

\* The 3<sup>rd</sup> generation cohort of the Framingham Heart Study (FHS) was not included because of small number of events (N=19).
