# Supplementary material for: Uncoupling associations of risk alleles with endophenotypes and phenotypes: insights from the ApoB locus and heart‐related traits
Source: PubMed Central journal article supplement (PMC5242299; doi:10.1111/acel.12526), 2016-09-28
Supplement: ACEL-16-61-s011.pdf [file ACEL-16-61-s011.pdf]

**Table S10. The associations of rs693 and rs562338 with risks of overall death: the role of lipids and myocardial infarction (MI).**

| SNPs                                          | ARIC,<br>N <sub>T/C</sub> =9,407/1,372 |      |         | FHS*,<br>N <sub>T/C</sub> =4,409/1,591 |      |         | MESA,<br>N <sub>T/C</sub> =2,475/174 |      |         | CHS,<br>N <sub>T/C</sub> =4,196/2,131 |      |         |
|-----------------------------------------------|----------------------------------------|------|---------|----------------------------------------|------|---------|--------------------------------------|------|---------|---------------------------------------|------|---------|
|                                               | Beta                                   | SE   | p-value | Beta*                                  | SE   | p-value | Beta*                                | SE   | p-value | Beta*                                 | SE   | p-value |
| <b><i>No adjustment for lipids and MI</i></b> |                                        |      |         |                                        |      |         |                                      |      |         |                                       |      |         |
| rs693, M1                                     | -0.06                                  | 0.04 | 1.1E-01 | -0.01                                  | 0.04 | 7.8E-01 | -0.24                                | 0.11 | 3.1E-02 | 0.06                                  | 0.03 | 6.7E-02 |
| rs562338, M1                                  | 0.01                                   | 0.05 | 7.8E-01 | -0.03                                  | 0.05 | 5.0E-01 | 0.26                                 | 0.13 | 4.2E-02 | -0.006                                | 0.04 | 8.9E-01 |
| rs693, M2                                     | -0.07                                  | 0.04 | 1.1E-01 | -0.02                                  | 0.04 | 5.9E-01 | -0.19                                | 0.12 | 1.1E-01 | 0.07                                  | 0.03 | 4.0E-02 |
| rs562338, M2                                  | -0.01                                  | 0.05 | 8.2E-01 | -0.04                                  | 0.05 | 4.2E-01 | 0.19                                 | 0.13 | 1.7E-01 | 0.02                                  | 0.04 | 6.0E-01 |
| <b><i>Adjusted for lipids</i></b>             |                                        |      |         |                                        |      |         |                                      |      |         |                                       |      |         |
| rs693, M1                                     | -0.08                                  | 0.04 | 5.5E-02 | -0.03                                  | 0.04 | 5.0E-01 | -0.23                                | 0.11 | 3.8E-02 | 0.07                                  | 0.03 | 4.0E-02 |
| rs562338, M1                                  | 0.02                                   | 0.05 | 7.6E-01 | -0.01                                  | 0.05 | 7.9E-01 | 0.25                                 | 0.13 | 4.5E-02 | -0.006                                | 0.04 | 8.8E-01 |
| rs693, M2                                     | -0.08                                  | 0.04 | 5.6E-02 | -0.03                                  | 0.04 | 4.2E-01 | -0.18                                | 0.12 | 1.2E-01 | 0.07                                  | 0.03 | 3.4E-02 |
| rs562338, M2                                  | -0.02                                  | 0.05 | 7.7E-01 | -0.03                                  | 0.05 | 6.0E-01 | 0.19                                 | 0.13 | 1.6E-01 | 0.02                                  | 0.04 | 5.9E-01 |
| <b><i>Adjusted for lipids and MI</i></b>      |                                        |      |         |                                        |      |         |                                      |      |         |                                       |      |         |
| rs693, M1                                     | -0.07                                  | 0.04 | 7.4E-02 | 0.00                                   | 0.04 | 1.0E-00 | -0.24                                | 0.11 | 3.9E-02 | 0.05                                  | 0.03 | 7.7E-02 |
| rs562338, M1                                  | 0.02                                   | 0.05 | 7.4E-01 | -0.02                                  | 0.05 | 6.7E-01 | 0.26                                 | 0.13 | 4.7E-02 | -0.003                                | 0.04 | 9.3E-01 |
| rs693, M2                                     | -0.07                                  | 0.04 | 7.7E-02 | -0.01                                  | 0.04 | 8.8E-01 | -0.18                                | 0.12 | 1.2E-01 | 0.06                                  | 0.03 | 6.7E-02 |
| rs562338, M2                                  | -0.01                                  | 0.05 | 8.2E-01 | -0.02                                  | 0.05 | 6.5E-01 | 0.19                                 | 0.14 | 1.4E-01 | 0.01                                  | 0.04 | 6.1E-01 |

N<sub>T/C</sub> denotes total number (T) of individuals in the analyses and the number of cases (C) among them.

M1 denotes model 1 with one reference SNP included.

M2 denotes model 2 with both reference SNPs included.

Lipids include total cholesterol and high-density lipoprotein cholesterol.

The effect beta was evaluated in the Cox proportional hazard regression model. Sign of beta indicates direction of the effect in additive genetic models with alleles A considered as effect alleles for each SNP.

SE denotes standard error.

\* The 3<sup>rd</sup> generation cohort of the Framingham Heart Study (FHS) was not included because of small number of events (N=19).
